# Supplementary material for: Quality of guidelines for infection management in sepsis: a critical appraisal using the AGREE II instrument
Source: Springer Nature journal article supplement (doi:10.1186/s12874-025-02491-8), 2025-02-21
Supplement: MOESM1 [file 12874_2025_2491_MOESM1_ESM.pdf]

## Appendix 1. Domains and items of the AGREE II instrument\*

| Domain                     | Item | Content                                                                                                    |
|----------------------------|------|------------------------------------------------------------------------------------------------------------|
| 1. Scope and Purpose       | 1    | The overall objective(s) of the guideline is (are) specifically described.                                 |
|                            | 2    | The health question(s) covered by the guideline is (are) specifically described.                           |
|                            | 3    | The population (patients, public, etc.) to whom the guideline is meant to apply is specifically described. |
| 2. Stakeholder Involvement | 4    | The guideline development group includes individuals from all relevant professional groups.                |
|                            | 5    | The views and preferences of the target population (patients, public, etc.) have been sought.              |
|                            | 6    | The target users of the guideline are clearly defined.                                                     |
| 3. Rigour of Development   | 7    | Systematic methods were used to search for evidence.                                                       |
|                            | 8    | The criteria for selecting the evidence are clearly described.                                             |
|                            | 9    | The strengths and limitations of the body of evidence are clearly described.                               |
|                            | 10   | The methods for formulating the recommendations are clearly described.                                     |
|                            | 11   | The health benefits, side effects, and risks have been considered in formulating the recommendations.      |
|                            | 12   | There is an explicit link between the recommendations and the supporting evidence.                         |
|                            | 13   | The guideline has been externally reviewed by experts prior to its publication.                            |
|                            | 14   | A procedure for updating the guideline is provided.                                                        |
| 4. Clarity of Presentation | 15   | The recommendations are specific and unambiguous.                                                          |
|                            | 16   | The different options for management of the condition or health issue are clearly presented.               |
|                            | 17   | Key recommendations are easily identifiable.                                                               |
| 5. Applicability           | 18   | The guideline describes facilitators and barriers to its application.                                      |
|                            | 19   | The guideline provides advice and/or tools on how the recommendations can be put into practice.            |
|                            | 20   | The potential resource implications of applying the recommendations have been considered.                  |
|                            | 21   | The guideline presents monitoring and/or auditing criteria.                                                |
| 6. Editorial Independence  | 22   | The views of the funding body have not influenced the content of the guideline.                            |
|                            | 23   | Competing interests of guideline development group members have been recorded and addressed.               |

\* References: [25].
